# Supplementary material for: Genetic variations in the TERT and CLPTM1L gene region and gastrointestinal stromal tumors risk
Source: PubMed Central journal article supplement (PMC4741611; doi:10.18632/oncotarget.5153), 2015-09-08
Supplement: oncotarget-06-31360-s001.pdf [file oncotarget-06-31360-s001.pdf]

## SUPPLEMENTARY TABLES

Supplementary Table S1: Variants represented by each tagSNP

| SNP        | Proxy      | Distance | RSquared | DPrime | Chromosome | Coordinate_HG18 |
|------------|------------|----------|----------|--------|------------|-----------------|
| rs7726159  | rs2736100  | 4197     | 0.828    | 0.926  | chr5       | 1339516         |
| rs7726159  | rs7725218  | 95       | 0.759    | 0.887  | chr5       | 1335414         |
| rs7726159  | rs7734992  | 2191     | 0.692    | 0.847  | chr5       | 1333128         |
| rs7726159  | rs4975538  | 1489     | 0.662    | 0.874  | chr5       | 1333830         |
| rs7726159  | rs10054203 | 2355     | 0.66     | 0.812  | chr5       | 1332964         |
| rs7726159  | rs35888851 | 785      | 0.618    | 0.872  | chr5       | 1336104         |
| rs7726159  | rs2853677  | 4875     | 0.545    | 0.855  | chr5       | 1340194         |
| rs7726159  | rs2736099  | 5021     | 0.474    | 0.74   | chr5       | 1340340         |
| rs7726159  | rs72709458 | 1436     | 0.329    | 0.839  | chr5       | 1336755         |
| rs7726159  | rs10069690 | 2529     | 0.329    | 0.839  | chr5       | 1332790         |
| rs2853677  | rs2736099  | 146      | 0.719    | 0.914  | chr5       | 1340340         |
| rs2853677  | rs2736100  | 678      | 0.586    | 0.902  | chr5       | 1339516         |
| rs2853677  | rs7726159  | 4875     | 0.545    | 0.855  | chr5       | 1335319         |
| rs2853677  | rs2853672  | 5789     | 0.543    | 0.947  | chr5       | 1345983         |
| rs2853677  | rs2735940  | 9292     | 0.524    | 0.946  | chr5       | 1349486         |
| rs2853677  | rs7725218  | 4780     | 0.447    | 0.761  | chr5       | 1335414         |
| rs2853677  | rs7734992  | 7066     | 0.441    | 0.755  | chr5       | 1333128         |
| rs2853677  | rs35888851 | 4090     | 0.42     | 0.832  | chr5       | 1336104         |
| rs2853677  | rs10054203 | 7230     | 0.417    | 0.748  | chr5       | 1332964         |
| rs2853677  | rs4975538  | 6364     | 0.335    | 0.624  | chr5       | 1333830         |
| rs2853677  | rs13167280 | 6717     | 0.308    | 1      | chr5       | 1333477         |
| rs2736098  | rs2736109  | 2673     | 0.888    | 0.96   | chr5       | 1349759         |
| rs2736098  | rs2736108  | 3402     | 0.723    | 1      | chr5       | 1350488         |
| rs2736098  | rs2853672  | 1103     | 0.63     | 1      | chr5       | 1345983         |
| rs2736098  | rs2735940  | 2400     | 0.609    | 1      | chr5       | 1349486         |
| rs2736098  | rs2736103  | 6315     | 0.449    | 0.735  | chr5       | 1353401         |
| rs2736098  | rs2735846  | 5293     | 0.426    | 0.751  | chr5       | 1352379         |
| rs2736098  | rs13174919 | 5776     | 0.425    | 0.767  | chr5       | 1352862         |
| rs2736098  | rs4975612  | 6224     | 0.397    | 0.835  | chr5       | 1353310         |
| rs2736098  | rs13174814 | 5773     | 0.388    | 0.759  | chr5       | 1352859         |
| rs2736098  | rs2736099  | 6746     | 0.384    | 0.655  | chr5       | 1340340         |
| rs2736098  | rs2736105  | 5670     | 0.344    | 0.634  | chr5       | 1352756         |
| rs13172201 | rs11133719 | 137      | 0.459    | 0.722  | chr5       | 1324524         |
| rs10069690 | rs72709458 | 3965     | 1        | 1      | chr5       | 1336755         |

(Continued)

| SNP        | Proxy       | Distance | RSquared | DPrime | Chromosome | Coordinate_HG18 |
|------------|-------------|----------|----------|--------|------------|-----------------|
| rs10069690 | rs2242652   | 238      | 0.817    | 1      | chr5       | 1333028         |
| rs10069690 | rs56345976  | 2917     | 0.559    | 1      | chr5       | 1329873         |
| rs10069690 | rs4975538   | 1040     | 0.539    | 1      | chr5       | 1333830         |
| rs10069690 | rs7734992   | 338      | 0.484    | 1      | chr5       | 1333128         |
| rs10069690 | rs10054203  | 174      | 0.467    | 1      | chr5       | 1332964         |
| rs10069690 | rs7725218   | 2624     | 0.414    | 0.925  | chr5       | 1335414         |
| rs10069690 | rs2736100   | 6726     | 0.381    | 0.919  | chr5       | 1339516         |
| rs10069690 | rs7726159   | 2529     | 0.329    | 0.839  | chr5       | 1335319         |
| rs10069690 | rs73023637  | 473618   | 0.313    | 1      | chr5       | 859172          |
| rs451360   | rs13170453  | 2199     | 1        | 1      | chr5       | 1370481         |
| rs451360   | rs36115365  | 6438     | 1        | 1      | chr5       | 1366242         |
| rs451360   | rs35953391  | 7351     | 1        | 1      | chr5       | 1365329         |
| rs451360   | rs380145    | 9217     | 1        | 1      | chr5       | 1381897         |
| rs451360   | rs4635969   | 11128    | 1        | 1      | chr5       | 1361552         |
| rs451360   | rs7446461   | 13159    | 1        | 1      | chr5       | 1359521         |
| rs451360   | rs27071     | 26401    | 1        | 1      | chr5       | 1399081         |
| rs451360   | rs27068     | 27559    | 1        | 1      | chr5       | 1400239         |
| rs451360   | rs37004     | 37004    | 0.925    | 1      | chr5       | 1409684         |
| rs451360   | rs71595005  | 18843    | 0.85     | 1      | chr5       | 1353837         |
| rs451360   | rs111986123 | 22477    | 0.81     | 1      | chr5       | 1395157         |
| rs451360   | rs37002     | 37264    | 0.733    | 0.92   | chr5       | 1409944         |
| rs451360   | rs421629    | 456      | 0.714    | 1      | chr5       | 1373136         |
| rs451360   | rs381949    | 2788     | 0.714    | 1      | chr5       | 1375468         |
| rs451360   | rs13178866  | 3532     | 0.714    | 1      | chr5       | 1376212         |
| rs451360   | rs421284    | 5910     | 0.714    | 1      | chr5       | 1378590         |
| rs451360   | rs466502    | 6087     | 0.714    | 1      | chr5       | 1378767         |
| rs451360   | rs465498    | 6123     | 0.714    | 1      | chr5       | 1378803         |
| rs451360   | rs452932    | 10573    | 0.714    | 1      | chr5       | 1383253         |
| rs451360   | rs452384    | 11160    | 0.714    | 1      | chr5       | 1383840         |
| rs451360   | rs370348    | 11539    | 0.714    | 1      | chr5       | 1384219         |
| rs451360   | rs457130    | 16498    | 0.714    | 1      | chr5       | 1389178         |
| rs451360   | rs467095    | 16541    | 0.714    | 1      | chr5       | 1389221         |
| rs451360   | rs455433    | 16563    | 0.714    | 1      | chr5       | 1389243         |
| rs451360   | rs460073    | 16779    | 0.714    | 1      | chr5       | 1389459         |
| rs451360   | rs462608    | 16946    | 0.714    | 1      | chr5       | 1389626         |
| rs451360   | rs456366    | 17390    | 0.714    | 1      | chr5       | 1390070         |
| rs451360   | rs459961    | 17426    | 0.714    | 1      | chr5       | 1390106         |

(Continued)

| SNP      | Proxy       | Distance | RSquared | DPrime | Chromosome | Coordinate_HG18 |
|----------|-------------|----------|----------|--------|------------|-----------------|
| rs451360 | rs31484     | 18226    | 0.714    | 1      | chr5       | 1390906         |
| rs451360 | rs31489     | 23034    | 0.714    | 1      | chr5       | 1395714         |
| rs451360 | rs31490     | 24778    | 0.714    | 1      | chr5       | 1397458         |
| rs451360 | rs27996     | 25794    | 0.714    | 1      | chr5       | 1398474         |
| rs451360 | rs27070     | 26623    | 0.714    | 1      | chr5       | 1399303         |
| rs451360 | rs37011     | 29118    | 0.714    | 1      | chr5       | 1401798         |
| rs451360 | rs40181     | 34782    | 0.714    | 1      | chr5       | 1407462         |
| rs451360 | rs76236979  | 15379    | 0.706    | 1      | chr5       | 1357301         |
| rs451360 | rs3816659   | 1860     | 0.673    | 1      | chr5       | 1370820         |
| rs451360 | rs4975616   | 4020     | 0.673    | 1      | chr5       | 1368660         |
| rs451360 | rs4975615   | 4337     | 0.673    | 1      | chr5       | 1368343         |
| rs451360 | rs10078017  | 5671     | 0.673    | 1      | chr5       | 1367009         |
| rs451360 | rs28379291  | 5979     | 0.673    | 1      | chr5       | 1366701         |
| rs451360 | rs13356727  | 7223     | 0.673    | 1      | chr5       | 1365457         |
| rs451360 | rs6866783   | 7660     | 0.673    | 1      | chr5       | 1365020         |
| rs451360 | rs6866294   | 7987     | 0.673    | 1      | chr5       | 1364693         |
| rs451360 | rs11133727  | 12915    | 0.673    | 1      | chr5       | 1359765         |
| rs451360 | rs4404721   | 13515    | 0.673    | 1      | chr5       | 1359165         |
| rs451360 | rs2735945   | 15779    | 0.673    | 1      | chr5       | 1356901         |
| rs451360 | rs2853666   | 16766    | 0.673    | 1      | chr5       | 1355914         |
| rs451360 | rs117256253 | 26872    | 0.673    | 1      | chr5       | 1399552         |
| rs451360 | rs414965    | 4441     | 0.638    | 0.917  | chr5       | 1377121         |
| rs451360 | rs37010     | 29855    | 0.638    | 0.917  | chr5       | 1402535         |
| rs451360 | rs37009     | 30659    | 0.638    | 0.917  | chr5       | 1403339         |
| rs451360 | rs40182     | 30717    | 0.638    | 0.917  | chr5       | 1403397         |
| rs451360 | rs37008     | 31858    | 0.638    | 0.917  | chr5       | 1404538         |
| rs451360 | rs37007     | 32692    | 0.638    | 0.917  | chr5       | 1405372         |
| rs451360 | rs37006     | 35378    | 0.638    | 0.917  | chr5       | 1408058         |
| rs451360 | rs37003     | 37091    | 0.638    | 0.917  | chr5       | 1409771         |
| rs451360 | rs55901723  | 22474    | 0.636    | 1      | chr5       | 1395154         |
| rs451360 | rs35029535  | 34704    | 0.636    | 1      | chr5       | 1337976         |
| rs451360 | rs4530805   | 13349    | 0.602    | 1      | chr5       | 1359331         |
| rs451360 | rs2447853   | 13397    | 0.602    | 1      | chr5       | 1386077         |
| rs451360 | rs6554758   | 9528     | 0.598    | 0.915  | chr5       | 1363152         |
| rs451360 | rs27069     | 27448    | 0.598    | 0.915  | chr5       | 1400128         |
| rs451360 | rs37005     | 36770    | 0.494    | 0.755  | chr5       | 1409450         |
| rs451360 | rs61574973  | 10512    | 0.456    | 0.75   | chr5       | 1362168         |

(Continued)

| SNP      | Proxy       | Distance | RSquared | DPrime | Chromosome | Coordinate_HG18 |
|----------|-------------|----------|----------|--------|------------|-----------------|
| rs451360 | rs6890396   | 39418    | 0.368    | 1      | chr5       | 1412098         |
| rs451360 | rs33963617  | 40241    | 0.368    | 1      | chr5       | 1332439         |
| rs451360 | rs117468417 | 2891     | 0.362    | 0.754  | chr5       | 1369789         |
| rs451360 | rs402710    | 1042     | 0.347    | 1      | chr5       | 1373722         |
| rs451360 | rs401681    | 2407     | 0.333    | 1      | chr5       | 1375087         |
